# Supplementary material
Source: PubMed Central journal article supplement (PMC3392707)
Supplement: supp_139.15.2821_DEV079939FigS2.pdf [file supp_139.15.2821_DEV079939FigS2.pdf]

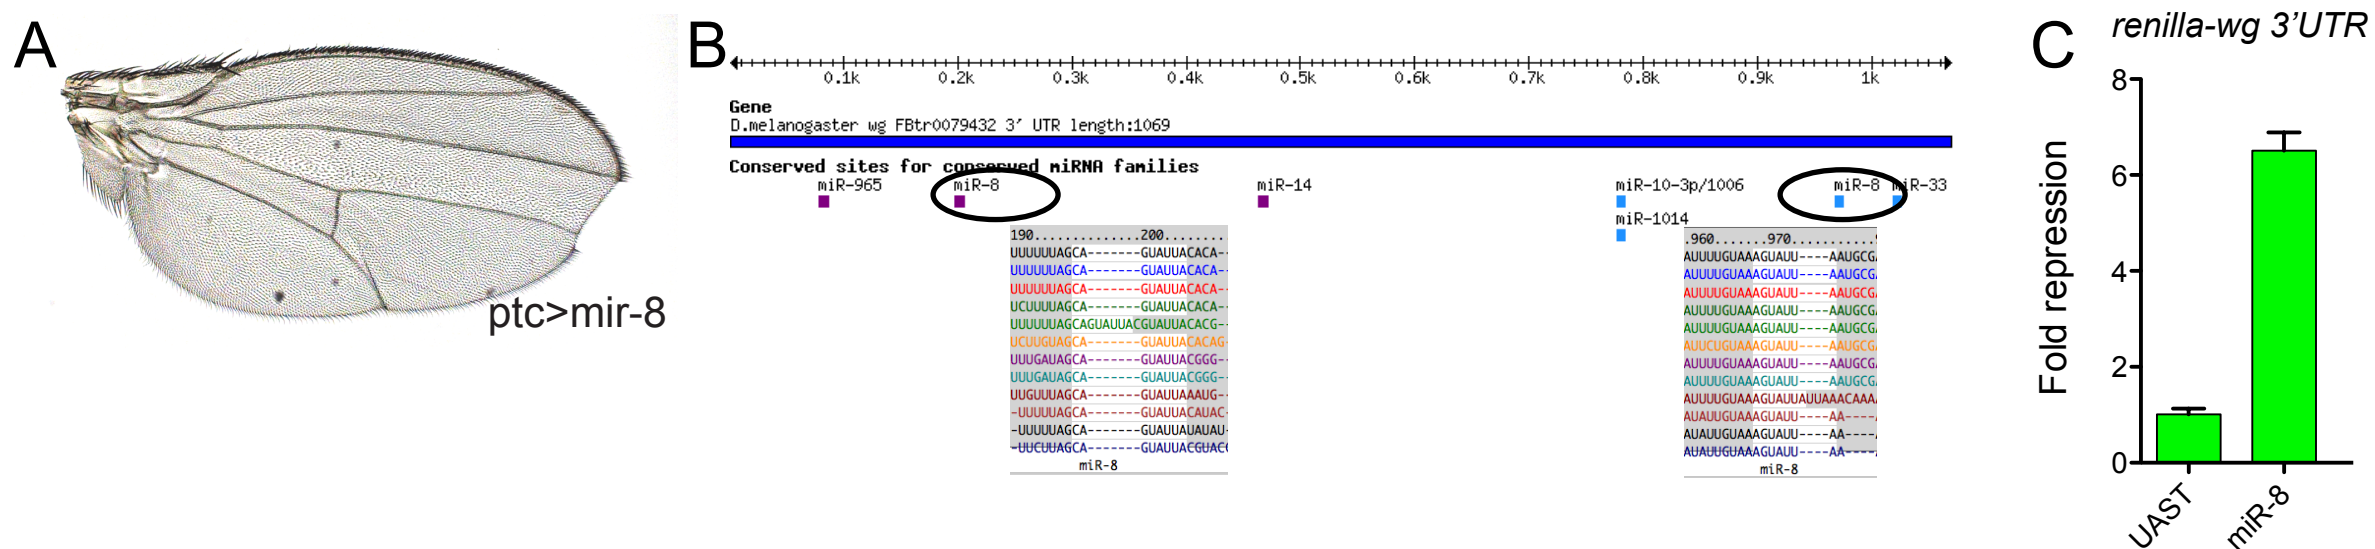

Supplementary Figure 2. Ectopic miR-8 induces loss of wing margin and can directly target the wingless 3' UTR

- (A) Wg is the Wingless pathway ligand and its loss causes loss of wing margin. Similarly, misexpression of mir-8 using *ptc*-Gal4 induces loss of wing margin.
- (B) The *wg* 3' UTR contains two conserved binding site for miR-8.
- (C) A *renilla-wg* 3' UTR sensor is repressed by cotransfected UAS-DsRed-mir-8/*ub*-Gal4 in S2 cells.
